# Supplementary material
Source: PubMed Central journal article supplement (PMC5812757)
Supplement: mmc1.pdf [file mmc1.pdf]

## Sleep Patterns and Hypertension Using Actigraphy in the Hispanic Community Health Study/Study of Latinos

*Alberto R. Ramos, MD, MSPH; Jia Weng, PhD; Douglas M. Wallace, MD; Megan R. Petrov, PhD; William K. Wohlgemuth, PhD; Daniela Sotres-Alvarez, DrPH; Jose S. Loreda, MD; Kathryn J. Reid, PhD; Phyllis C. Zee, MD, PhD; Yasmin Mossavar-Rahmani, PhD; and Sanjay R. Patel, MD*

CHEST 2018; 153(1):87-93

*Online supplements are not copyedited prior to posting and the author(s) take full responsibility for the accuracy of all data.*

© 2017 AMERICAN COLLEGE OF CHEST PHYSICIANS. Reproduction of this article is prohibited without written permission from the American College of Chest Physicians. See online for more details. DOI: 10.1016/j.chest.2017.09.028

**e-Appendix 1.**

University of Pittsburgh PRO16020627

**Sites Baseline IRB***Protocol #*

Albert Einstein College of Medicine CCI #: 2006-535 FWA #: 00000140

University of Miami HHSN268200625234C FWA #: 00002247

Northwestern University 200601-0471

University of California, San Diego 3677

**Sites V2 IRB**

Albert Einstein College of Medicine

University of Miami 20131007 (CR00005385)

Northwestern University 2013-1261

University of California, San Diego 1586091

**e-Table 1.** Descriptive statistics for the studied sample of Sueño participants N=2148

| Variable                              | Class                                         | Mean (SD) or n, % |
|---------------------------------------|-----------------------------------------------|-------------------|
| Age (Years)                           |                                               | 47.0 (11.6)       |
| Gender                                | Female                                        | 1392, 64.8 %      |
|                                       | Male                                          | 756, 35.2 %       |
| Ethnic Background                     | Dominican                                     | 269, 12.5 %       |
|                                       | Central American                              | 290, 13.5 %       |
|                                       | Cuban                                         | 389, 18.1 %       |
|                                       | Mexican                                       | 575, 26.8 %       |
|                                       | Puerto Rican                                  | 451, 21.0 %       |
|                                       | South American                                | 174, 8.1 %        |
| Site                                  | Bronx, NY                                     | 546, 25.4 %       |
|                                       | Chicago, IL                                   | 578, 26.9 %       |
|                                       | Miami, FL                                     | 667, 31.1 %       |
|                                       | San Diego, CA                                 | 357, 16.6 %       |
| Employment                            | Not employed                                  | 902, 42.0 %       |
|                                       | Currently employed                            | 1246, 58.0 %      |
| Income                                | ≥ 20,000                                      | 1001, 50.5 %      |
|                                       | <\$20,000                                     | 983, 49.5 %       |
| Education                             | More than high school                         | 1451, 67.6 %      |
|                                       | Lower than high school                        | 694, 32.4 %       |
| Obesity                               | Non-Obese                                     | 1201, 56.5 %      |
|                                       | Obese (BMI ≥30)                               | 925, 43.5 %       |
| Current Smoker                        | No                                            | 1725, 80.3 %      |
|                                       | Yes                                           | 422, 19.7 %       |
| Alcohol use                           | No or low use                                 | 2042, 95.1 %      |
|                                       | High use                                      | 105, 4.9 %        |
| Caffeine use                          | No or low use                                 | 1370, 63.9 %      |
|                                       | High use                                      | 774, 36.1 %       |
| Moderate-severe sleep apnea (AHI ≥15) | No                                            | 1930, 91.3 %      |
|                                       | Yes                                           | 184, 8.7 %        |
| Nativity                              | US(including US territory) born               | 356, 16.6 %       |
|                                       | Foreign born, living at least 10 years in US  | 1232, 57.5 %      |
|                                       | Foreign born, living less than 10 years in US | 553, 25.8 %       |
| Systolic BP                           |                                               | 120.3 (16.8)      |
| Diastolic BP                          |                                               | 73.6 (10.9)       |
| Anti-Hypertensive use                 |                                               | 339, 16.5%        |

\*High level of alcohol use defined as ≥ 7 drinks/week for women or ≥14 drinks/week for men based on the National Institute on Alcohol Abuse and Alcoholism definition of problem drinking. High level of Caffeine use defined as ≥ 3 cups of caffeinated beverages on a typical day. Column percentiles were presented for overall sample, while row percentiles were presented for Hypertension groups.
